# Supplementary material for: The COM-B model: a cross-sectional survey assessing capability, opportunities, and motivation to follow the MIND diet among informal female caregivers of people with Alzheimer's disease and related dementias
Source: Frontiers journal article supplement (doi:10.3389/frdem.2024.1451310), 2024-10-03
Supplement: Data_Sheet_1.PDF [file Data_Sheet_1.PDF]

## MIND Diet Capability, Opportunities, and Motivation Questionnaire

| Construct                       | Questions (modified from Timlin et al., 2021)                                                                                                                                                                                                                                                                                                                                                                                                                                                                                                                                                                                                                                                                                                                                                                                                                                                                                                                                                                                                                                                                                                                                                                                                                                                 |
|---------------------------------|-----------------------------------------------------------------------------------------------------------------------------------------------------------------------------------------------------------------------------------------------------------------------------------------------------------------------------------------------------------------------------------------------------------------------------------------------------------------------------------------------------------------------------------------------------------------------------------------------------------------------------------------------------------------------------------------------------------------------------------------------------------------------------------------------------------------------------------------------------------------------------------------------------------------------------------------------------------------------------------------------------------------------------------------------------------------------------------------------------------------------------------------------------------------------------------------------------------------------------------------------------------------------------------------------|
| <b>Psychological Capability</b> | To what extent is eating MIND diet foods something you normally do?<br>(4) Always (3) Often (2) Sometimes (1) Rarely (0) Never                                                                                                                                                                                                                                                                                                                                                                                                                                                                                                                                                                                                                                                                                                                                                                                                                                                                                                                                                                                                                                                                                                                                                                |
| <b>Physical Capability</b>      | To what extent are you confident in cooking/eating MIND diet foods?<br>(4) Very confident (3) Fairly confident (2) Somewhat confident (1) Slightly confident<br>(0) Not confident at all                                                                                                                                                                                                                                                                                                                                                                                                                                                                                                                                                                                                                                                                                                                                                                                                                                                                                                                                                                                                                                                                                                      |
| <b>Social Opportunity</b>       | To what extent would your family or friends encourage you to eat MIND diet foods?<br>(0) Not at all (1) A little bit (2) Somewhat (3) Quite a bit (4) Very much<br><br>To what extent do/would your family or friends discourage you from eating MIND diet foods?<br>(0) Not at all (1) A little bit (2) Somewhat (3) Quite a bit (4) Very much                                                                                                                                                                                                                                                                                                                                                                                                                                                                                                                                                                                                                                                                                                                                                                                                                                                                                                                                               |
| <b>Physical Opportunity</b>     | Is there anything in your work or/and home environment that might <b>help you</b> eat the MIND diet foods? What things will encourage you to consume the MIND diet? Select all that apply.<br><input type="checkbox"/> Access to the food/stores<br><input type="checkbox"/> Transportation<br><input type="checkbox"/> Season<br><input type="checkbox"/> Budget/Money<br><input type="checkbox"/> Time<br><input type="checkbox"/> Cooking skill<br><input type="checkbox"/> Culture<br><input type="checkbox"/> Family<br><input type="checkbox"/> Caregiving<br><input type="checkbox"/> Friends<br><input type="checkbox"/> Other<br><br>Is there anything in your work or/and home environment that might <b>discourage</b> you from eating the MIND diet foods? What are the challenges to consuming the MIND diet? Select all that apply.<br><input type="checkbox"/> Access to the food/stores<br><input type="checkbox"/> Transportation<br><input type="checkbox"/> Season<br><input type="checkbox"/> Budget/Money<br><input type="checkbox"/> Time<br><input type="checkbox"/> Cooking skill<br><input type="checkbox"/> Culture<br><input type="checkbox"/> Family<br><input type="checkbox"/> Caregiving<br><input type="checkbox"/> Friends<br><input type="checkbox"/> Other |
| <b>Reflective Motivation</b>    | To what extent would eating the MIND diet be supported by your friends and family?<br>(0) Not at all (1) A little bit (2) Somewhat (3) Quite a bit (4) Very much                                                                                                                                                                                                                                                                                                                                                                                                                                                                                                                                                                                                                                                                                                                                                                                                                                                                                                                                                                                                                                                                                                                              |
| <b>Automatic Motivation</b>     | How do you feel about eating the MIND diet?<br>(1) Extremely good (2) Somewhat good (3) Neither good nor bad (4) Somewhat bad<br>(5) Extremely bad                                                                                                                                                                                                                                                                                                                                                                                                                                                                                                                                                                                                                                                                                                                                                                                                                                                                                                                                                                                                                                                                                                                                            |
